# Supplementary material for: Acarbose improved survival for Apc+/Min mice
Source: PubMed Central journal article supplement (PMC6996958; doi:10.1111/acel.13088), 2020-01-06

A

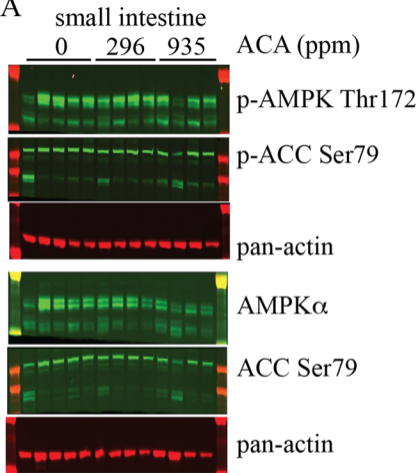

B

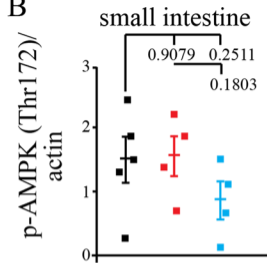

C

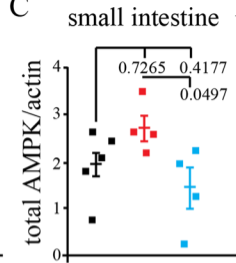

D

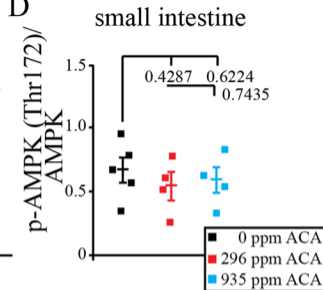

E

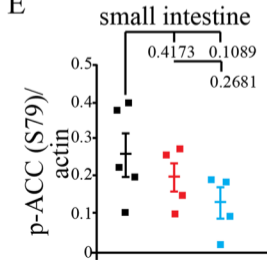

F

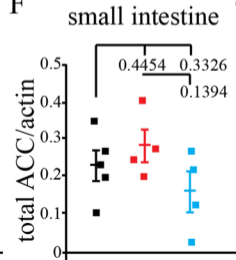

G

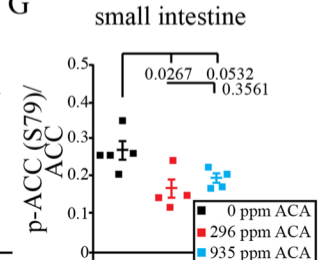

Supplement: ACEL-19-e13088-s002.pdf [file ACEL-19-e13088-s002.pdf]
