# Supplementary material for: Acarbose improved survival for Apc+/Min mice
Source: PubMed Central journal article supplement (PMC6996958; doi:10.1111/acel.13088), 2020-01-06

A

visceral fat

0 296 935

ACA (ppm)

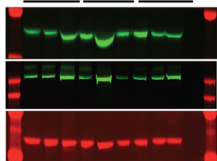

p-AMPK Thr172

p-ACC Ser79

pan-actin

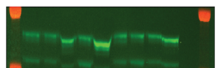AMPK $\alpha$ 

ACC Ser79

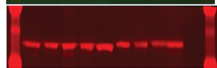

pan-actin

B

visceral fat

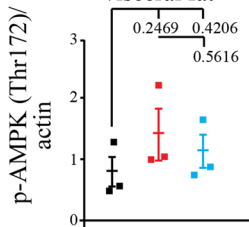p-AMPK (Thr172)/  
actin

C

visceral fat

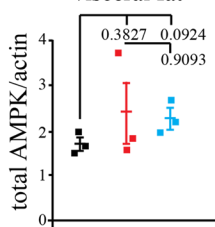

total AMPK/actin

D

visceral fat

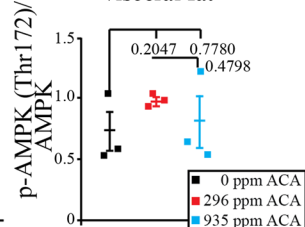p-AMPK (Thr172)/  
AMPK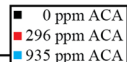

E

visceral fat

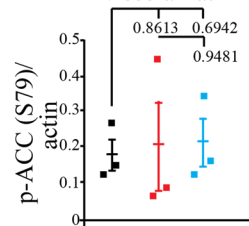p-ACC (S79)/  
actin

F

visceral fat

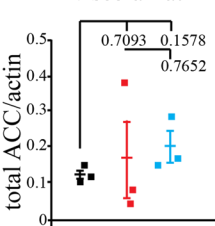

total ACC/actin

G

visceral fat

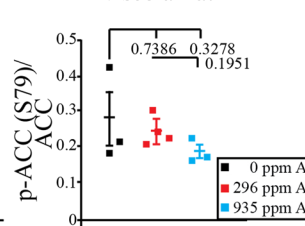p-ACC (S79)/  
ACC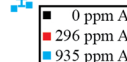

Supplement: ACEL-19-e13088-s003.pdf [file ACEL-19-e13088-s003.pdf]
