# Supplementary material for: Acarbose improved survival for Apc+/Min mice
Source: PubMed Central journal article supplement (PMC6996958; doi:10.1111/acel.13088), 2020-01-06

A

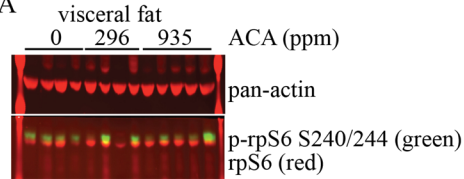

B

phospho (S240/244)/  
actin

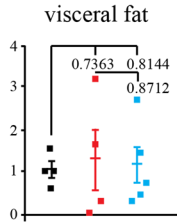

C

total rpS6/actin

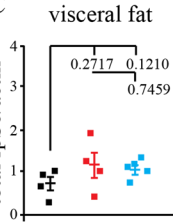

D

phospho (S240/244)/  
rpS6

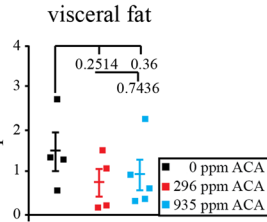

Supplement: ACEL-19-e13088-s006.pdf [file ACEL-19-e13088-s006.pdf]
