# Supplementary material for: Acarbose improved survival for Apc+/Min mice
Source: PubMed Central journal article supplement (PMC6996958; doi:10.1111/acel.13088), 2020-01-06

A

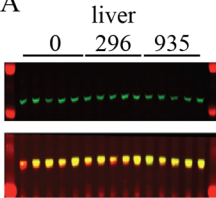

ACA (ppm)

pan-actin

p-rpS6 S240/244 (green)  
rpS6 (red)

B

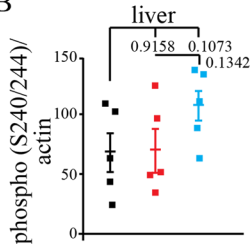

C

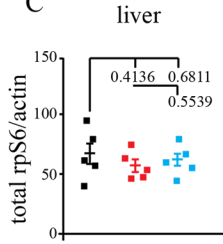

D

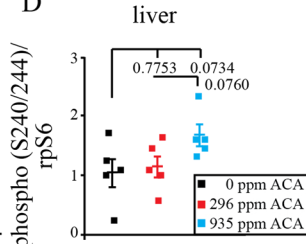

Supplement: ACEL-19-e13088-s007.pdf [file ACEL-19-e13088-s007.pdf]
