# Supplementary material for: Acarbose improved survival for Apc+/Min mice
Source: PubMed Central journal article supplement (PMC6996958; doi:10.1111/acel.13088), 2020-01-06

A

small intestine

0 296 935

ACA (ppm)

p-AKT Ser473 (green)

AKT (red)

pan-actin

GAPDH

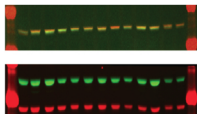

B

small intestine

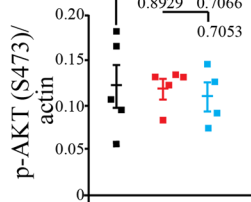

C

small intestine

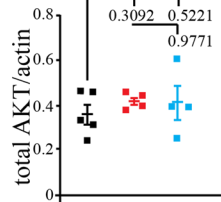

D

small intestine

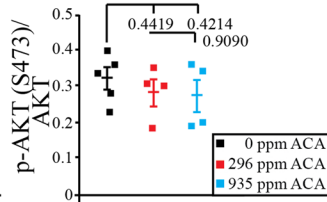

E

small intestine

0 296 935

ACA (ppm)

p-AKT T308 (green)

AKT (red)

pan-actin

GAPDH

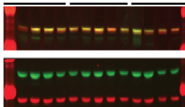

F

small intestine

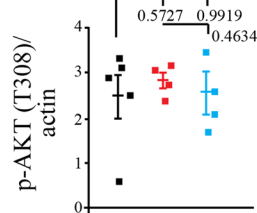

G

small intestine

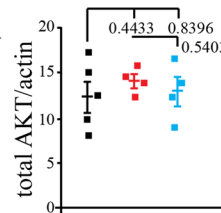

H

small intestine

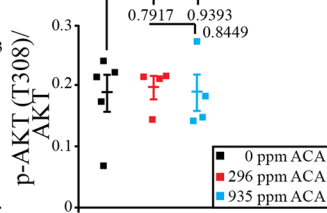

Supplement: ACEL-19-e13088-s008.pdf [file ACEL-19-e13088-s008.pdf]
