# Supplementary material for: Acarbose improved survival for Apc+/Min mice
Source: PubMed Central journal article supplement (PMC6996958; doi:10.1111/acel.13088), 2020-01-06

A

visceral fat

0 296 935 ACA (ppm)

p-AKT Ser473 (green)  
AKT (red)

pan-actin

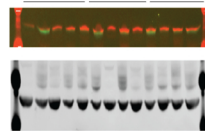

B

visceral fat

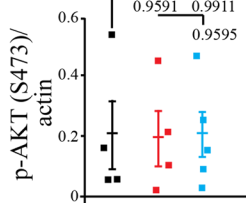

C

visceral fat

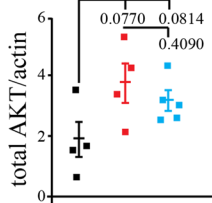

D

visceral fat

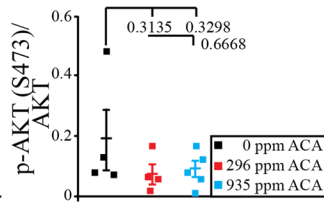

E

visceral fat

0 296 935 ACA (ppm)

p-AKT T308 (green)  
AKT (red)

pan-actin

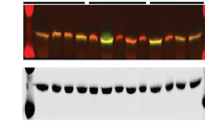

F

visceral fat

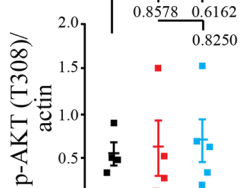

G

visceral fat

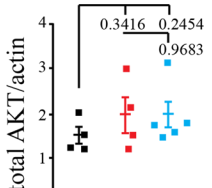

H

visceral fat

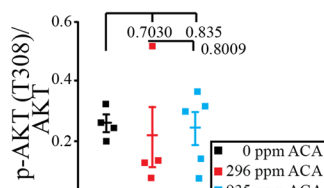

Supplement: ACEL-19-e13088-s009.pdf [file ACEL-19-e13088-s009.pdf]
