# Supplementary material for: Acarbose improved survival for Apc+/Min mice
Source: PubMed Central journal article supplement (PMC6996958; doi:10.1111/acel.13088), 2020-01-06

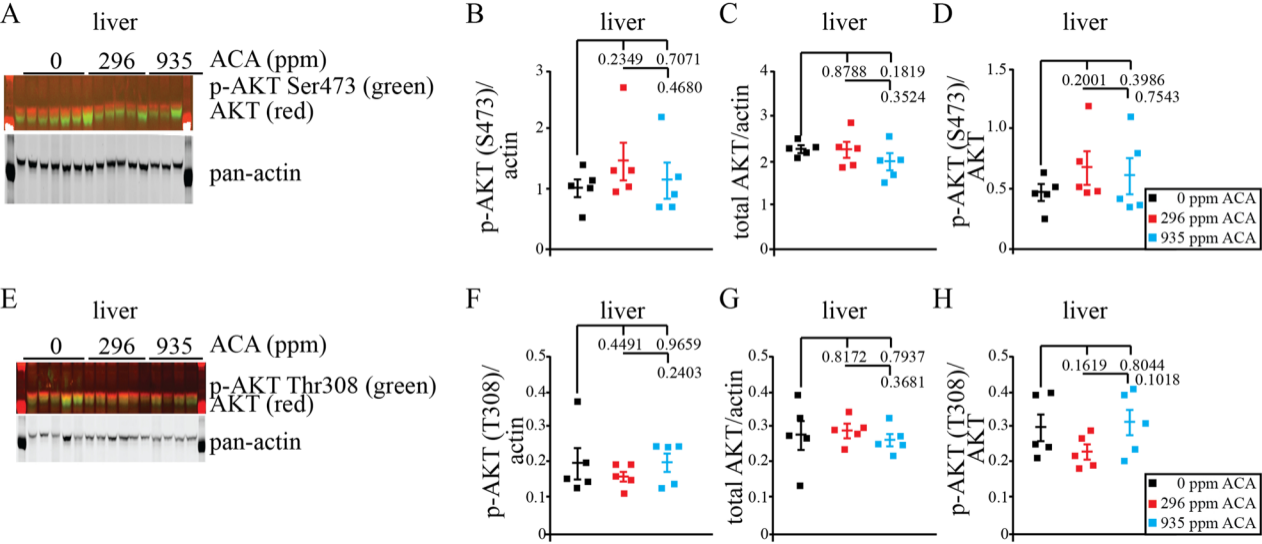

Supplement: ACEL-19-e13088-s010.pdf [file ACEL-19-e13088-s010.pdf]
